# Supplementary material
Source: PubMed Central journal article supplement (PMC6522276)
Supplement: NIHMS1521056-supplement-1.pdf [file NIHMS1521056-supplement-1.pdf]

**Phosphatase 1 Nuclear Targeting Subunit Mediates the Recruitment and Function of  
Poly (ADP-ribose) Polymerase 1 in DNA Repair**

Feifei Wang<sup>1,2</sup>, Songli Zhu<sup>2</sup>, Laura A. Fisher<sup>2</sup>, Ling Wang<sup>2</sup>, Nicholas J. Eurek<sup>2</sup>, James K.  
Wahl III<sup>2</sup>, Li Lan<sup>3,4</sup>, and Aimin Peng<sup>2\*</sup>

1. Institute of Physical Science and Information Technology, Anhui University, Hefei 230601, People's Republic of China
2. Department of Oral Biology, College of Dentistry, University of Nebraska Medical Center, Lincoln, NE 68583.
3. Department of Microbiology and Molecular Genetics, University of Pittsburgh School of Medicine; 450 Technology Drive, 523 Bridgside Point II, Pittsburgh, Pennsylvania 15219, USA.
4. UPMC Hillman Cancer Center; 5117 Centre Avenue, Pittsburgh, Pennsylvania 15213, USA.

\* To whom correspondence should be addressed: Aimin Peng, Ph.D. Department of Oral Biology, College of Dentistry, University of Nebraska Medical Center, Lincoln, NE 68583. Tel: 402-472-5903, Fax: 402-472-2551. Email: Aimin.Peng@UNMC.edu

**Figure S1. PNUTS depletion causes endogenous DNA damage.** (A, B) HeLa cells were transfected with control or PNUTS siRNA (#1) for 1 day, and then treated with IR, followed by 30 min incubation. Cells were examined by immunofluorescence for  $\gamma$ H2AX. The average numbers of  $\gamma$ H2AX foci were counted (A), and representative images of cells stained for  $\gamma$ H2AX (in red) and DAPI (in blue) are shown (B). At least 100 cells were analyzed for  $\gamma$ H2AX foci in panel A. (C) SCC38 cells treated with scramble or PNUTS siRNA (#2), were harvested

and analyzed by immunoblotting for  $\gamma$ H2AX, and PNUTS.

**Figure S2. PNUTS depletion leads to DNA damage hypersensitivity. (A-D)** SCC38 cells with control or PNUTS siRNA (#1) were incubated with ionized radiation (IR, 10 Gy, panel A), bleomycin (Bleo, 5  $\mu$ g/ml, panel B), camptothecin (CPT, 5  $\mu$ M, panel C), and H<sub>2</sub>O<sub>2</sub> (5  $\mu$ M, panel D). Cells were incubated for 1-4 days. Cell viability was determined and normalized to that of the first day. The mean value and standard deviation were calculated from 3 independent experiments. **(E)** SCC38 cells were treated with scramble or PNUTS siRNA (#2) at day 0, and then with Dox at the indicated concentrations at day 1. The cell viability at day 3 was determined; the cell viability with Dox treatment was normalized to that without Dox treatment. The mean value and standard deviation were calculated from 3 independent experiments.

**Figure S3. The recruitment of PNUTS to DNA damage sites is dependent on PARP1.** HeLa cells expressing GFP-PNUTS were microirradiated with laser (405 nm). The path of laser microirradiation is marked by white lines (panels on the left). 3 min after laser treatment, the recruitment of GFP-PNUTS to laser induced DNA damage is shown. PARP inhibition with olaparib (10  $\mu$ M) prevented the recruitment of PNUTS. Quantification of cells exhibiting laser recruitment with or without olaparib is provided in Fig. 5E.

**Figure S4. PNUTS is required for the efficient induction of PARylation after DNA damage.** HeLa cells transfected with scramble or PNUTS siRNA (#2) were microirradiated with 405nm laser. 5 min post-laser, cells were analyzed by immunofluorescence for PAR and  $\gamma$ H2AX. The path of laser microirradiation is marked by white lines.

**Figure S5. PNUTS binds the middle segment of PARP1, and promotes its recruitment to laser-induced DNA damage sites. (A)** The middle segment of PARP1 (aa 389-669) was

tagged with GFP and expressed in HeLa cells. GFP IP was performed. 20% input, control IP, and GFP IP samples were analyzed by immunoblotting for PNUTS and GFP. **(B)** The middle segment of PARP1 was tagged with GFP, as in panel A, and expressed in HeLa cells with or without PNUTS knockdown. Cells were microirradiated with 405nm laser, and examined for the localization of GFP 3 min post-laser. The path of laser microirradiation is marked by white lines.

**Figure S6. PNUTS knockdown impairs the recruitment of GFP-PARP1 to laser-induced DNA damage sites.** HeLa cells expressing GFP-PARP1 were treated with control or PNUTS siRNA (#1). Cells were microirradiated with 405nm laser. The localization of GFP-PARP1 3 min post-laser is shown. The white lines mark the regions of laser microirradiation (right panels).

**Figure S7. PNUTS knockdown disrupts the recruitment of PARP1 to laser-induced DNA damage sites.** HeLa cells were treated with scramble or PNUTS siRNA (#2). Cells were microirradiated with 405nm laser. The localization of PARP1 3 min post-laser is shown by immunofluorescence. The white lines mark the regions of laser microirradiation.

**Figure S8. PNUTS targeting sensitizes SCC38 cells to PARP inhibition.** SCC38 cells were treated with scramble or PNUTS siRNA (#2) at day 0, and then with PARPi at the indicated concentrations at day 1. The cell viability at day 3 was determined; the cell viability with PARPi treatment was normalized to that without PARPi treatment. The mean value and standard deviation were calculated from 3 independent experiments.

**Figure S9. PNUTS targeting sensitizes HeLa cells to PARP inhibition.** **(A)** HeLa cells were treated with PNUTS siRNA (#1) and olaparib (10  $\mu$ M), as indicated. Cell viability was

determined at days 1-4, and normalized to that of day 1. The mean value and standard deviation were calculated from 3 independent experiments. **(B)** HeLa cells were treated with PNUTS siRNA (#1) and olaparib, as in panel A. The colonogenic assay was performed as described in Materials and Methods. The numbers of colonies were normalized to the untreated control. The mean value and standard deviation were calculated from 3 independent experiments. Statistical significance was analyzed using an unpaired 2-tailed Student's t-test. A p-value<0.01 was considered highly significant (\*\*).

**Movie S1. The recruitment of GFP-PNUTS after laser microirradiation is shown in a 10 min period.**

**Movie S2. The recruitment of GFP-PNUTS after laser microirradiation, in the presence of olaparib is shown in a 10 min period.**

**A**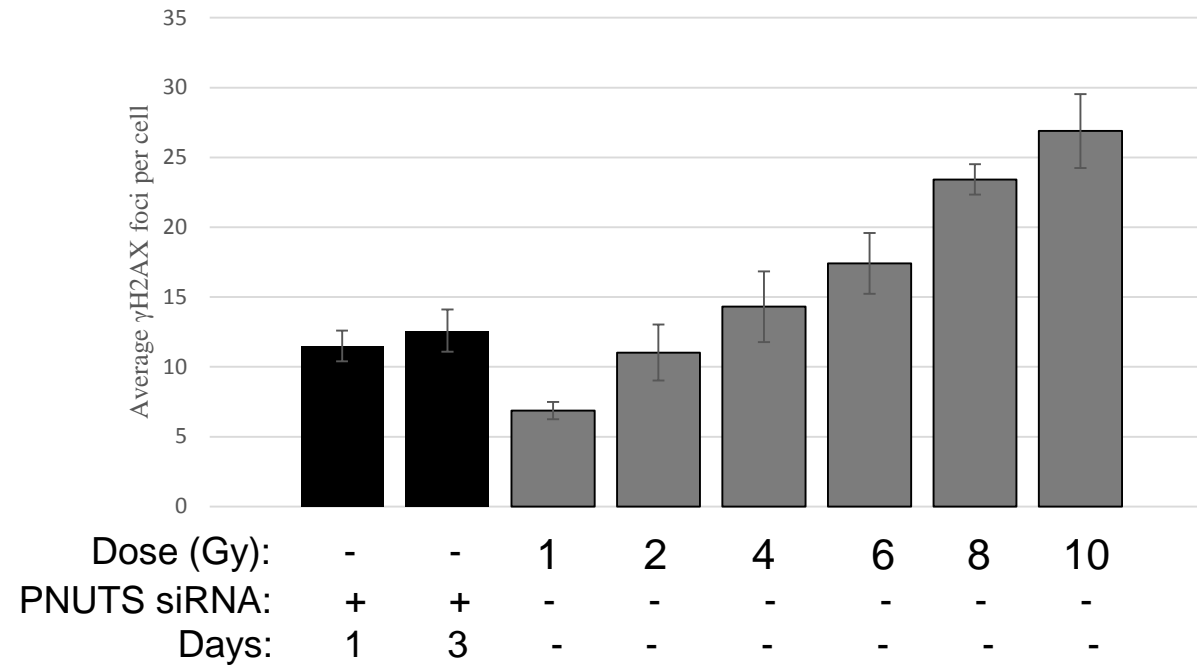**B**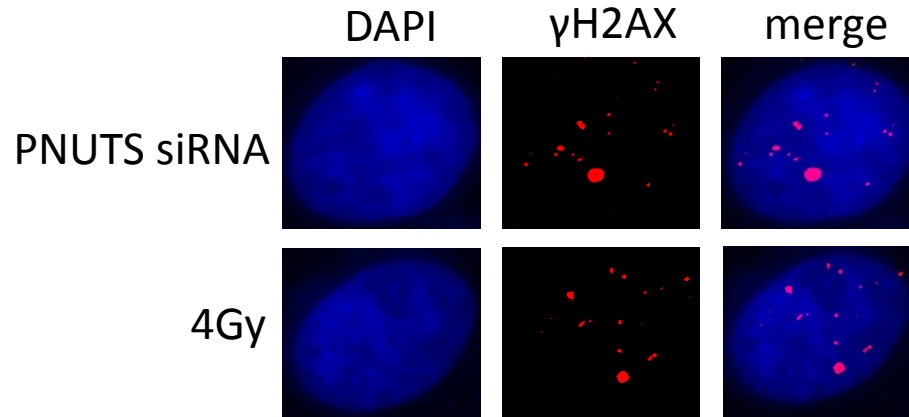**C**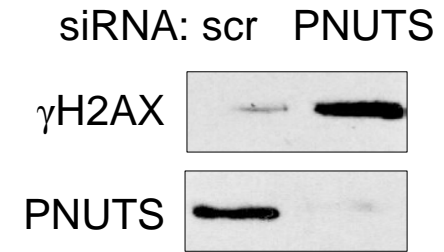

Figure S1

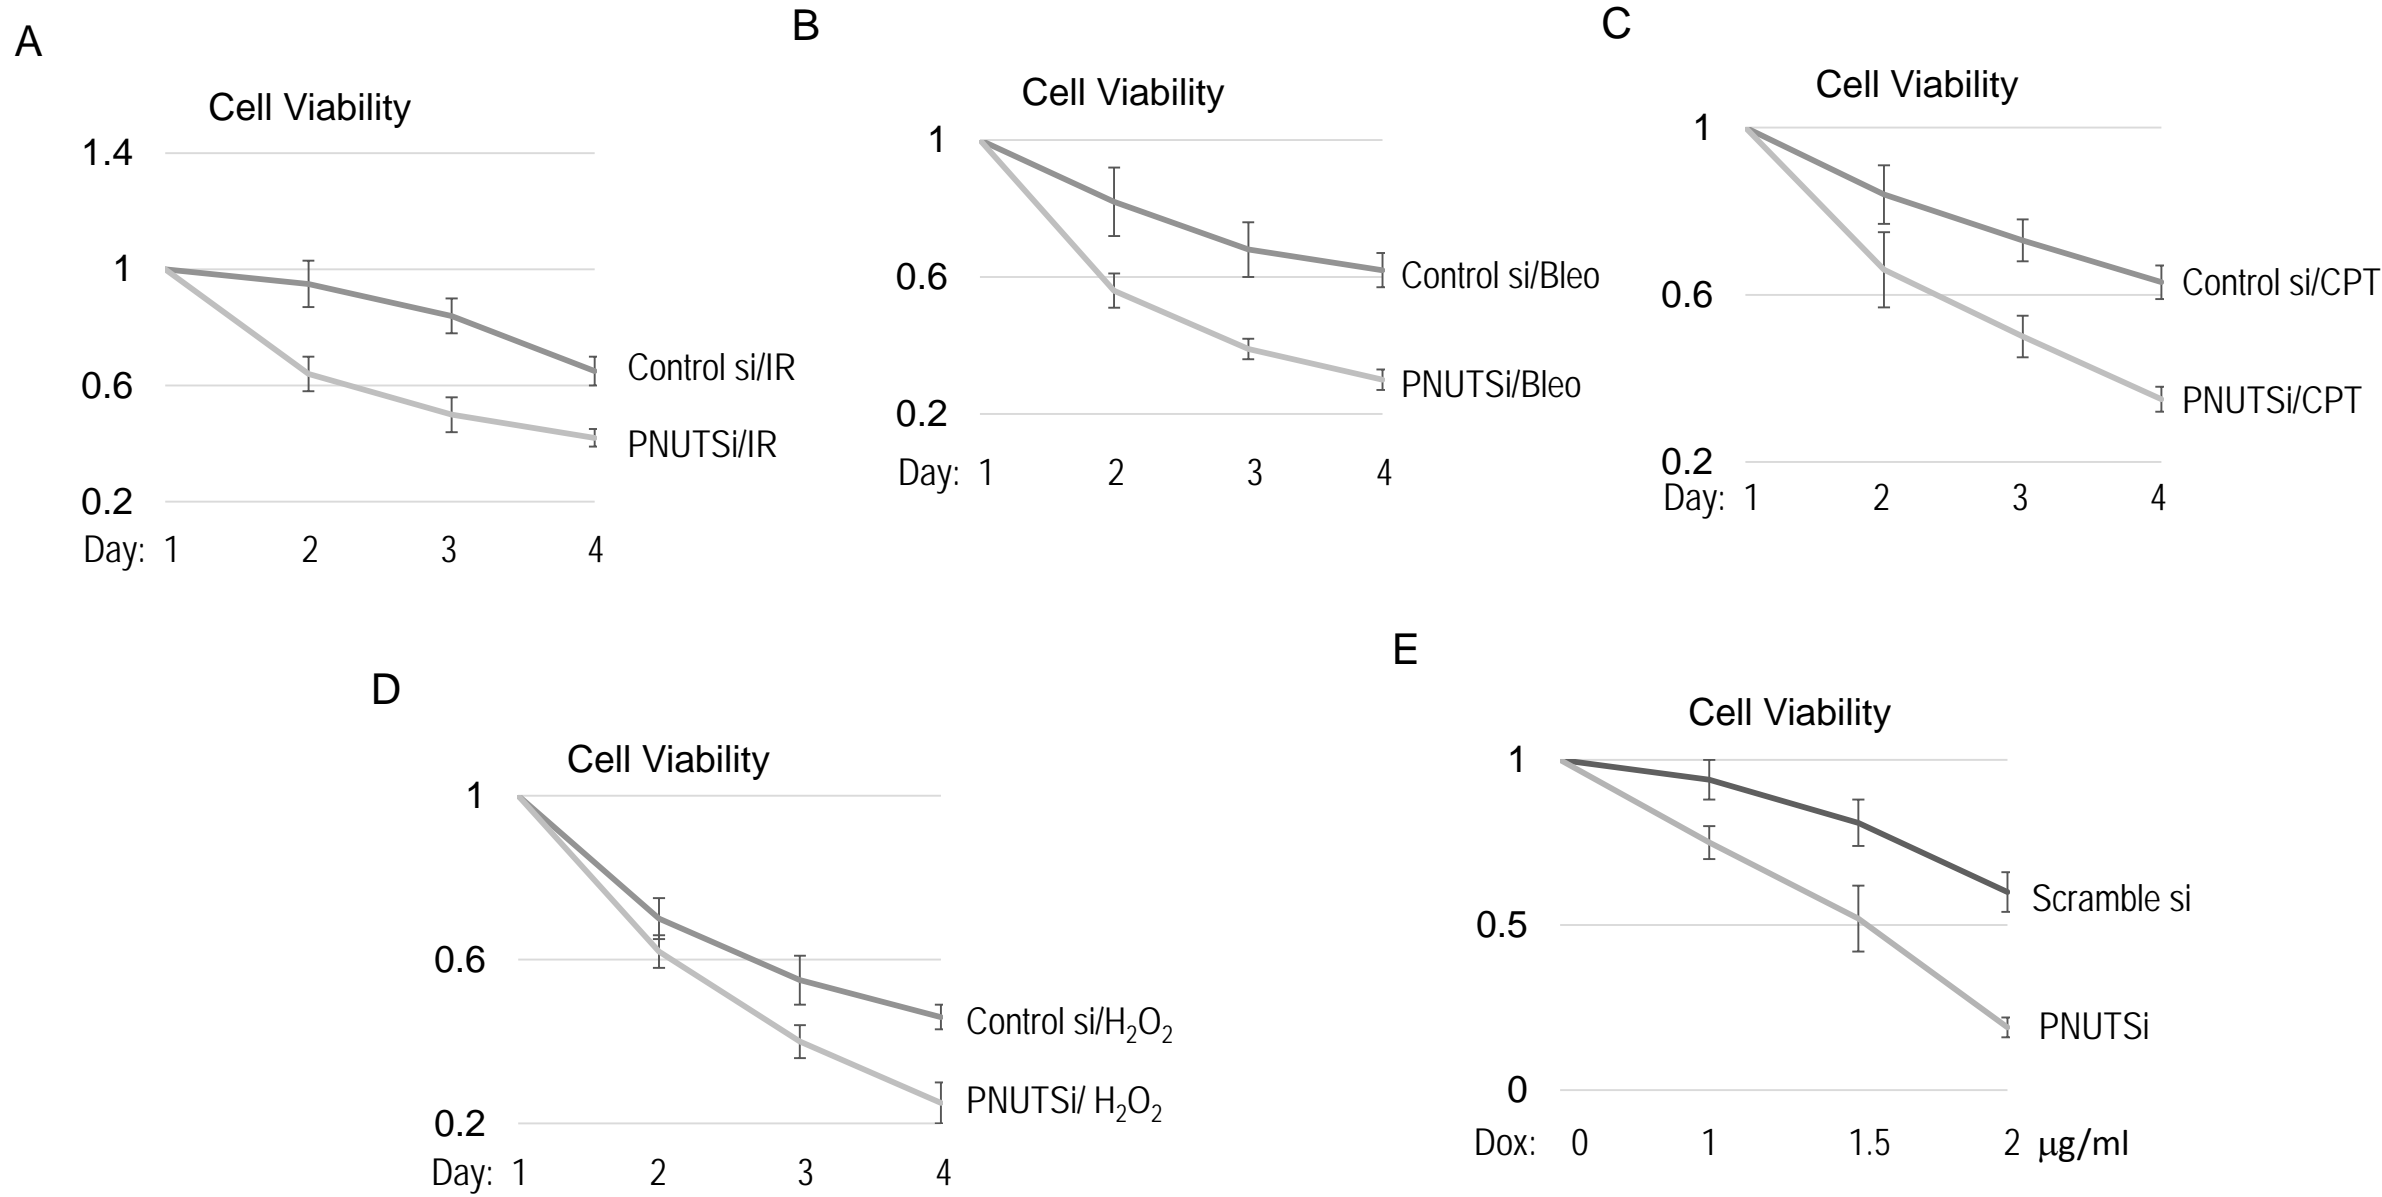

Figure S2

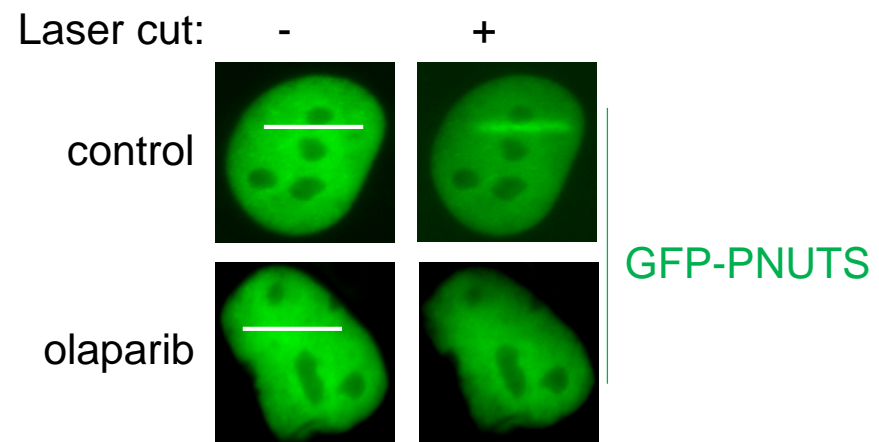

Figure S3

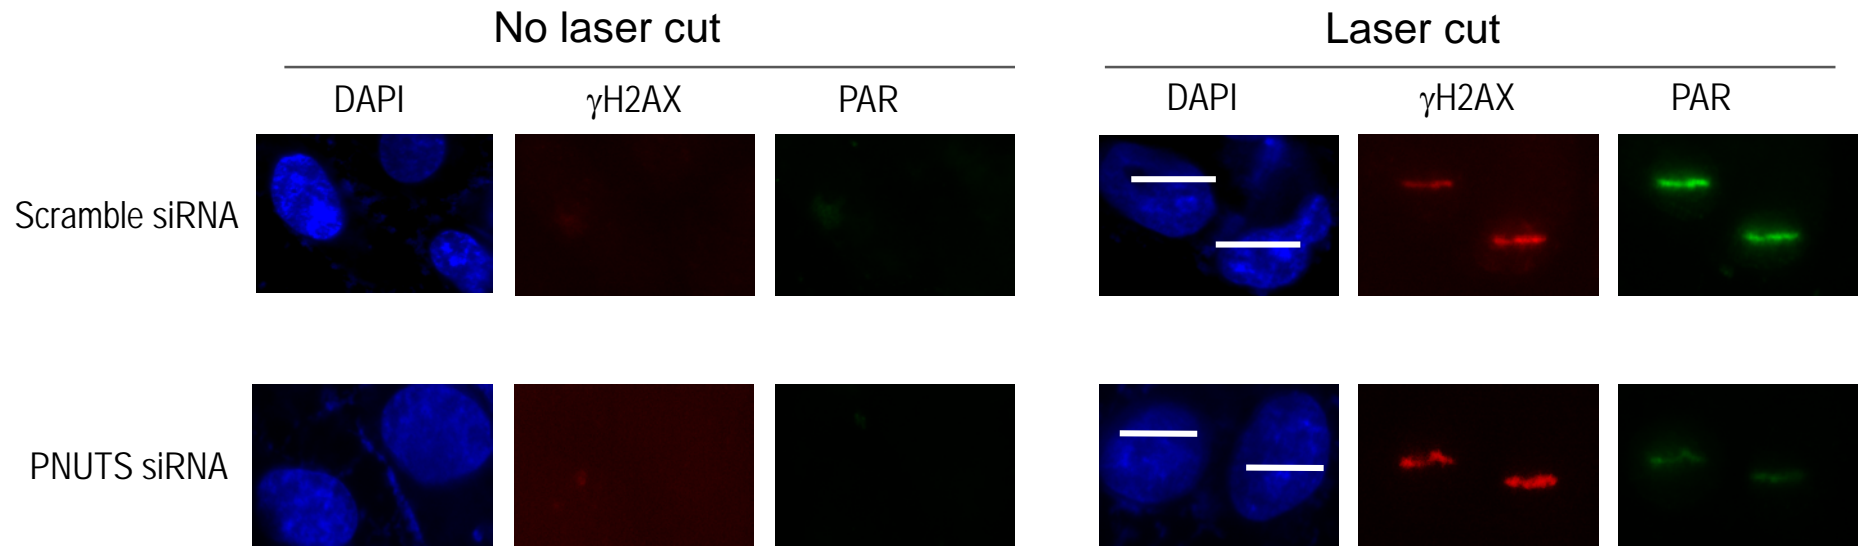

Figure S4



A

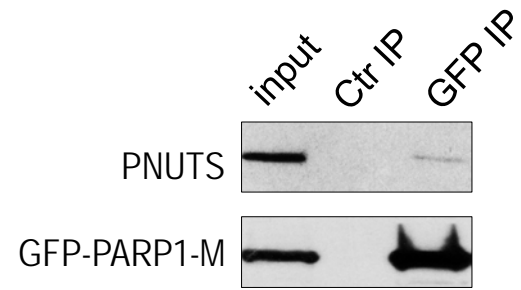

B

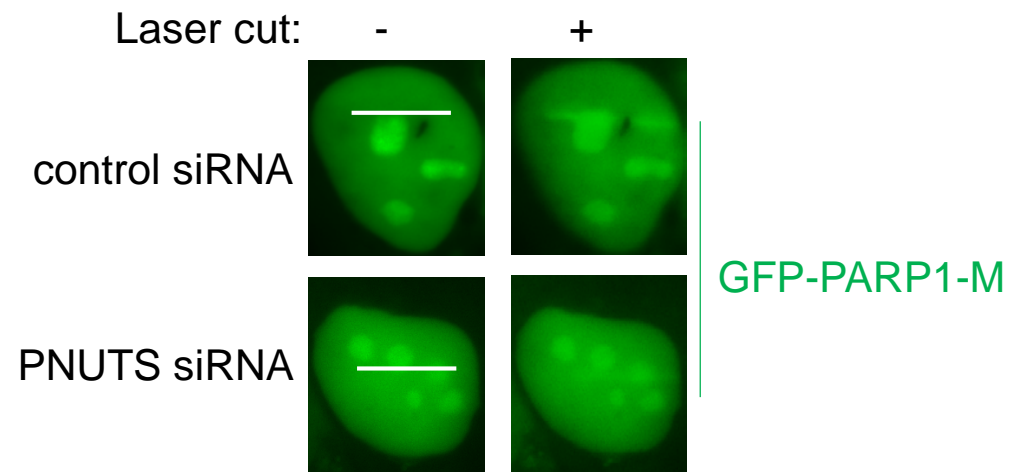

Figure S5

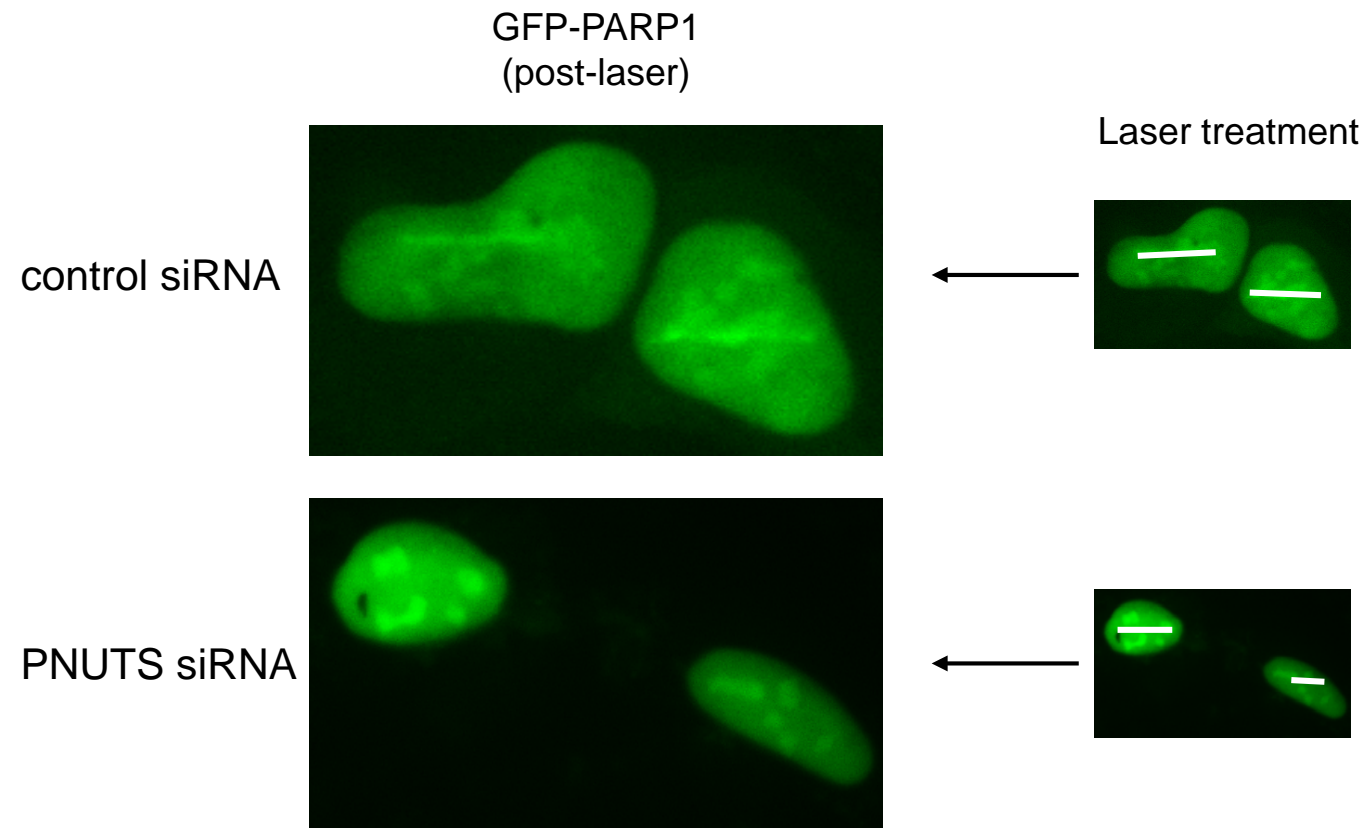

Figure S6

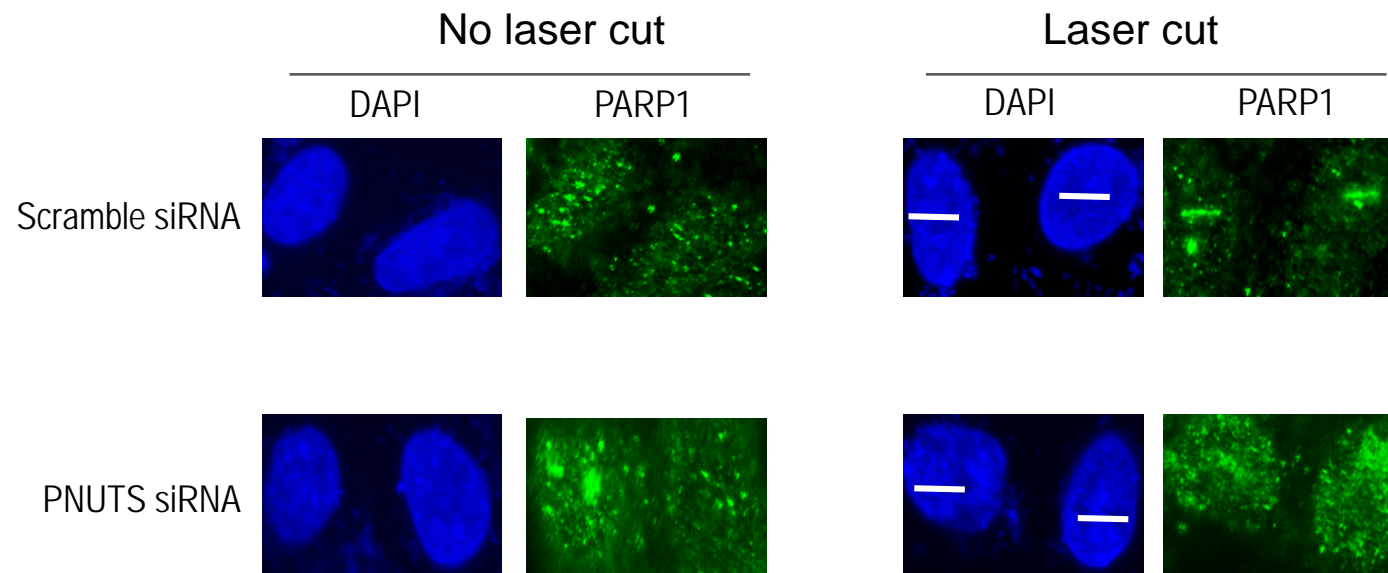

Figure S7

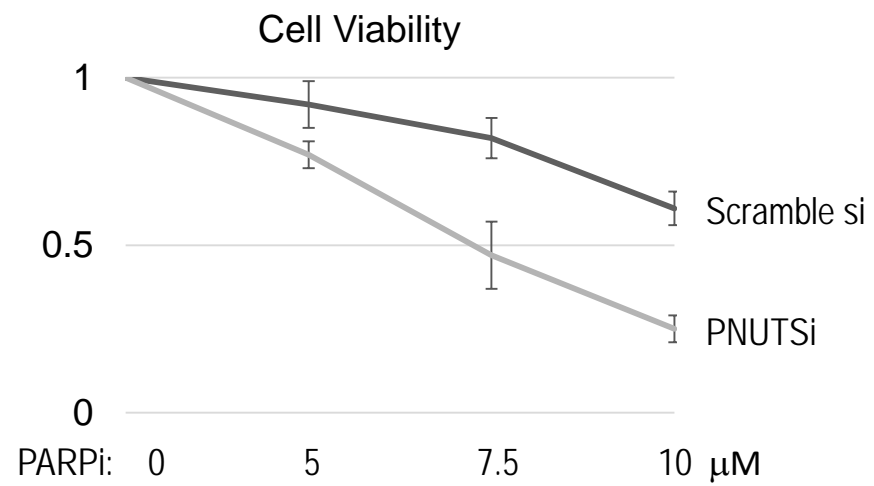

Figure S8

A

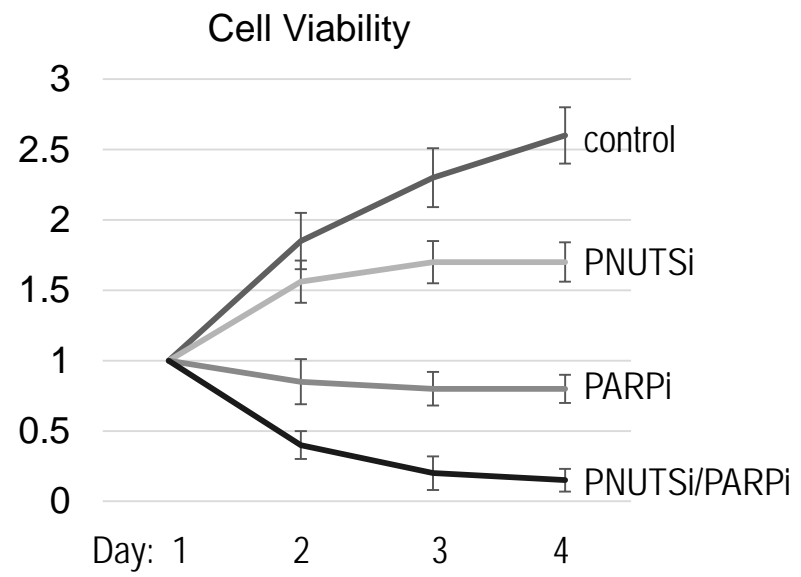

B

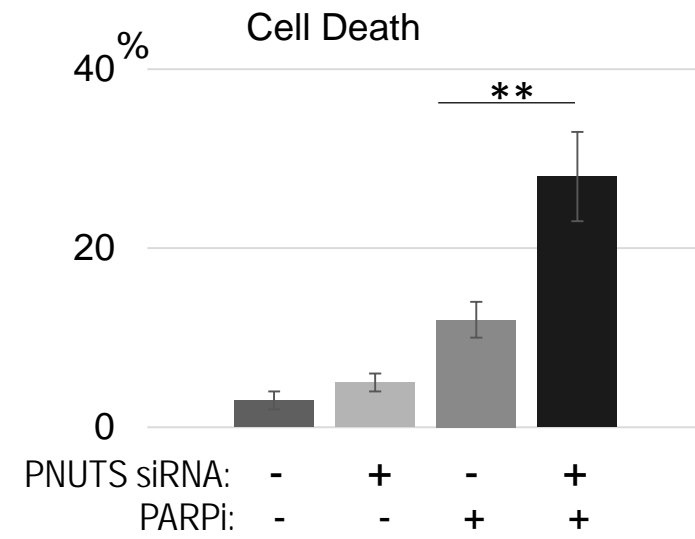

Figure S9
